# Supplementary material for: DNA template-regulated intergrowth of a fluorescent silver nanocluster emitter pair
Source: Royal Society of Chemistry journal article supplement (doi:10.1039/c5ra21159j), 2015-01-01
Supplement: c5ra21159j1.pdf [file c5ra21159j1.pdf]

## SUPPORTING INFORMATION

### **DNA Template-Regulated Intergrowth of Fluorescent Silver Nanocluster Emitter Pair**

*Jin-Liang Ma, Bin-Cheng Yin\*, and Bang-Ce Ye\**

Lab of Biosystem and Microanalysis, State Key Laboratory of Bioreactor Engineering, East China  
University of Science & Technology, Shanghai, 200237, P. R. China

Corresponding author: Bin-Cheng Yin, [binchengyin@ecust.edu.cn](mailto:binchengyin@ecust.edu.cn); Bang-Ce Ye, [bcye@ecust.edu.cn](mailto:bcye@ecust.edu.cn).

## List of contents:

| <b>Title of Different Section</b>                                                                                                   | <b>Table and Figure</b> | <b>Page</b> |
|-------------------------------------------------------------------------------------------------------------------------------------|-------------------------|-------------|
| <b>1. The Information of Oligonucleotides Used in This Study</b>                                                                    | Table S1                | 3-5         |
| <b>2. Supplementary Results</b>                                                                                                     |                         | 6-19        |
| <b>2.1 Four modes of emitter pair</b>                                                                                               | Figure S1               | 6           |
| <b>2.2 S-T<sub>n</sub>/AgNC (n=5, 10, 15, 20, 25, 30, 35, 70), S-0/AgNC, and Y-T<sub>15</sub>/AgNCs, and T<sub>15</sub>-N/AgNCs</b> | Figure S2               | 7           |
| <b>2.3 S-G<sub>n</sub>/AgNCs (n=1, 3, 5, 7, 10, 16 and 18)</b>                                                                      | Figure S3               | 8           |
| <b>2.4 Changes in fluorescence intensity before and after adding inhibitor</b>                                                      | Figure S4 and Figure S5 | 9-10        |
| <b>2.5 The replacement of nucleobase in spacer of DNA template</b>                                                                  | Figure S6               | 11          |
| <b>2.6 S-PEG(5)-T<sub>4</sub>/AgNCs and S-PEG(5)/AgNCs</b>                                                                          | Figure S7               | 12          |
| <b>2.7 The emission spectra of DNA/AgNCs at different excitation</b>                                                                | Figure S8               | 13          |
| <b>2.8 The mixture of two templates containing one emitter and 15-nt polythymine</b>                                                | Figure S9               | 14          |
| <b>2.9 Comparison of DNA/AgNCs from our obtained and the reported templates</b>                                                     | Table S2                | 15          |
| <b>2.10 The investigation on energy transfer</b>                                                                                    | Figure S10              | 16          |
| <b>2.11 The effect of AgNO<sub>3</sub> with different concentration</b>                                                             | Figure S11              | 17          |
| <b>2.12 The effect of different pH</b>                                                                                              | Figure S12              | 18          |
| <b>3. References</b>                                                                                                                |                         | 19          |

## 1. The Information of Oligonucleotides Used in This Study

**Table S1.** Sequence information for oligonucleotides used in this study

| No. | Name                   | Sequence* (5'-3')                                                |
|-----|------------------------|------------------------------------------------------------------|
| 1   | T1                     | T <sub>15</sub> -CCCTAACTCCCC                                    |
| 2   | T2                     | CCCTTAATCCCC-A <sub>15</sub>                                     |
| 3   | T3                     | TATATATATTTCCCTTAATCCCCAACTATACAACCTACTA                         |
| 4   | T4                     | TAGTAGGTTGTATAGTTCCTAACTCCCCAAATATATATA                          |
| 5   | T5                     | CCCTTAATCCCCTGAGGTAGTAACTATACAACCTACTACCTCACCTAACTCC<br>CC       |
| 6   | T6                     | TAGTAGGTTGTATAGTTCCTTAATCCCCCCTCCCTAACTCCCCAACTATACAAC<br>CTACTA |
| 7   | S-T <sub>70</sub>      | CCCTTAATCCCC-T <sub>70</sub> -CCCTAACTCCCC                       |
| 8   | S-T <sub>35</sub>      | CCCTTAATCCCC-T <sub>35</sub> -CCTAACTCCCC                        |
| 9   | S-T <sub>30</sub>      | CCCTTAATCCCC-T <sub>30</sub> -CCCTAACTCCCC                       |
| 10  | S-T <sub>25</sub>      | CCCTTAATCCCC-T <sub>25</sub> -CCCTAACTCCCC                       |
| 11  | S-T <sub>20</sub>      | CCCTTAATCCCC-T <sub>20</sub> -CCCTAACTCCCC                       |
| 12  | S-T <sub>15</sub> (YN) | CCCTTAATCCCC-T <sub>15</sub> -CCCTAACTCCCC                       |
| 13  | S-T <sub>10</sub>      | CCCTTAATCCCC-T <sub>10</sub> -CCCTAACTCCCC                       |
| 14  | S-T <sub>5</sub>       | CCCTTAATCCCC-T <sub>5</sub> -CCCTAACTCCCC                        |
| 15  | S-A <sub>35</sub>      | CCCTTAATCCCC-A <sub>35</sub> -CCCTAACTCCCC                       |
| 16  | S-A <sub>30</sub>      | CCCTTAATCCCC-A <sub>30</sub> -CCCTAACTCCCC                       |
| 17  | S-A <sub>25</sub>      | CCCTTAATCCCC-A <sub>25</sub> -CCCTAACTCCCC                       |
| 18  | S-A <sub>20</sub>      | CCCTTAATCCCC-A <sub>20</sub> -CCCTAACTCCCC                       |
| 19  | S-A <sub>15</sub>      | CCCTTAATCCCC-A <sub>15</sub> -CCCTAACTCCCC                       |
| 20  | S-A <sub>10</sub>      | CCCTTAATCCCC-A <sub>10</sub> -CCCTAACTCCCC                       |
| 21  | S-A <sub>5</sub>       | CCCTTAATCCCC-A <sub>5</sub> -CCCTAACTCCCC                        |
| 22  | S-C <sub>35</sub>      | CCCTTAATCCCC-C <sub>35</sub> -CCCTAACTCCCC                       |
| 23  | S-C <sub>30</sub>      | CCCTTAATCCCC-C <sub>30</sub> -CCCTAACTCCCC                       |
| 24  | S-C <sub>25</sub>      | CCCTTAATCCCC-C <sub>25</sub> -CCCTAACTCCCC                       |
| 25  | S-C <sub>20</sub>      | CCCTTAATCCCC-C <sub>20</sub> -CCCTAACTCCCC                       |

|    |                                    |                                                                                                                     |
|----|------------------------------------|---------------------------------------------------------------------------------------------------------------------|
| 26 | S-C <sub>15</sub>                  | CCCTTAATCCCC-C <sub>15</sub> -CCCTAACTCCCC                                                                          |
| 27 | S-C <sub>10</sub>                  | CCCTTAATCCCC-C <sub>10</sub> -CCCTAACTCCCC                                                                          |
| 28 | S-C <sub>5</sub>                   | CCCTTAATCCCC-C <sub>5</sub> -CCCTAACTCCCC                                                                           |
| 29 | S-0                                | CCCTTAATCCCCCCTAACTCCCC                                                                                             |
| 30 | S-G <sub>1</sub>                   | CCCTTAATCCCCGCGCTAACTCCCC                                                                                           |
| 31 | S-G <sub>3</sub>                   | CCCTTAATCCCCGGGCGCTAACTCCCC                                                                                         |
| 32 | S-G <sub>7</sub>                   | CCCTTAATCCCCGGTTGGGCGCTAACTCCCC                                                                                     |
| 33 | S-G <sub>8</sub>                   | CCCTTAATCCCCGGGGTGGGCGCTAACTCCCC                                                                                    |
| 34 | S-G <sub>13</sub>                  | CCCTTAATCCCCGGGGTGGGGTGGGCGCTAACTCCCC                                                                               |
| 35 | S-G <sub>16</sub>                  | CCCTTAATCCCCGGTGGGGTGGGGTGGGCGCTAACTCCCC                                                                            |
| 36 | S-G <sub>18</sub>                  | CCCTTAATCCCCGGGGTGGGGTGGGGTGGGCGCTAACTCCCC                                                                          |
| 37 | S-AT                               | CCCTTAATCCCCTTTTATATATTATATCCCTAACTCCCC                                                                             |
| 38 | C-AT                               | ATATAATATATAAAA                                                                                                     |
| 39 | T7                                 | CCCTTAATCCCCAACTATACAACCTACTACCTCA                                                                                  |
| 40 | T8                                 | TAGTAGGTTGTATAGTTCCCTAACTCCCC                                                                                       |
| 41 | I                                  | TGAGGTAGTAGGTTGTATAGTT                                                                                              |
| 42 | S-R <sub>15</sub> -C <sub>0</sub>  | CCCTTAATCCCCTTATATAATTTATTACCCTAACTCCCC                                                                             |
| 43 | S- R <sub>15</sub> -C <sub>3</sub> | CCCTTAATCCCCCTATACAATTTACTACCCTAACTCCCC                                                                             |
| 44 | S- R <sub>15</sub> -C <sub>4</sub> | CCCTTAATCCCCCTATACAATCTACTACCCTAACTCCCC                                                                             |
| 45 | S-R <sub>15</sub> -C <sub>5</sub>  | CCCTTAATCCCCCTATACAACCTACTACCCTAACTCCCC                                                                             |
| 46 | S- R <sub>22</sub> -C <sub>0</sub> | CCCTTAATCCCCAATTATATAATTTATTATTTTACCCTAACTCCCC                                                                      |
| 47 | S-R <sub>22</sub> -C <sub>6</sub>  | CCCTTAATCCCCAACTATACAATCTACTACTTCACCCTAACTCCCC                                                                      |
| 48 | S-R <sub>22</sub> -C <sub>8</sub>  | CCCTTAATCCCCAACTATACAACCTACTACCTCACCCCTAACTCCCC                                                                     |
| 49 | S-PEG <sub>5</sub> -T <sub>4</sub> | CCCTTAATCCCCTT-CH <sub>2</sub> -(CH <sub>2</sub> -O-CH <sub>2</sub> ) <sub>5</sub> -CH <sub>2</sub> -TTCCCTAACTCCCC |
| 50 | S-PEG <sub>5</sub>                 | CCCTTAATCCCC-CH <sub>2</sub> -(CH <sub>2</sub> -O-CH <sub>2</sub> ) <sub>5</sub> -CH <sub>2</sub> -CCCTAACTCCCC     |
| 51 | BG                                 | CCCTTAAACCCC -T <sub>15</sub> -CCCTCTTAACCC                                                                         |
| 52 | BY                                 | CCCTTAAACCCC-T <sub>15</sub> -CCCTTAATCCCC                                                                          |
| 53 | BR                                 | CCCTTAAACCCC-T <sub>15</sub> -CCTCCTTCCTCC                                                                          |
| 54 | BN                                 | CCCTTAAACCCC-T <sub>15</sub> -CCCTAACTCCCC                                                                          |
| 55 | GY                                 | CCCTCTTAACCC-T <sub>15</sub> -CCCTTAATCCCC                                                                          |

|    |                    |                                                  |
|----|--------------------|--------------------------------------------------|
| 56 | GR                 | CCCTCTTAACCC-T <sub>15</sub> -CCTCCTTCCTCC       |
| 57 | GN                 | CCCTCTTAACCC-T <sub>15</sub> -CCCTAACTCCCC       |
| 58 | YR                 | CCCTTAATCCCC-T <sub>15</sub> -CCTCCTTCCTCC       |
| 59 | RN                 | CCTCCTTCCTCC-T <sub>15</sub> -CCCTAACTCCCC       |
| 60 | YY                 | CCCTTAATCCCC-T <sub>15</sub> -CCCCTAATTCCC       |
| 61 | NN                 | CCCCTCAATCCC-T <sub>15</sub> -CCCTAACTCCCC       |
| 62 | BB                 | CCCTTTAACCCCC-T <sub>15</sub> -CCCCAATTCCC       |
| 63 | GG                 | CCCAATTCTCCC-T <sub>15</sub> -CCCTCTTAACCC       |
| 64 | RR                 | CCTCCTTCCTCC-T <sub>15</sub> -TCCTCCTTCCTCC      |
| 65 | T <sub>15</sub> -N | T <sub>15</sub> - CCCCTCAATCCC                   |
| 66 | N-T <sub>15</sub>  | CCCCTCAATCCC-T <sub>15</sub>                     |
| 67 | Y-T <sub>15</sub>  | CCCTTAATCCCC-T <sub>15</sub>                     |
| 68 | R-T <sub>15</sub>  | CCTCCTTCCTCC-T <sub>15</sub>                     |
| 69 | G-T <sub>15</sub>  | CCCTCTTAACCC-T <sub>15</sub>                     |
| 70 | B-T <sub>15</sub>  | CCCTTTAACCCCC-T <sub>15</sub>                    |
| 71 | S-I                | CCCTTAATCCCC TATAATAAATTTTAAATATTATTATTAAT       |
| 72 | S-G                | ATTAATAAATAATATTTAAAATTTATTATAGGGTGGGGTGGGGTGGGG |
| 73 | Y                  | CCCTTAATCCCC                                     |
| 74 | N                  | CCCTAACTCCCC                                     |

\*The nucleobases in orange, purple, blue, green and red color represent yellow, near-IR, blue, green and red emitter-nucleation sequences, respectively. The nucleobases in wine red represent G-enhancer sequences.

## 2. Supplementary Results

### 2.1 Four modes of emitter pair

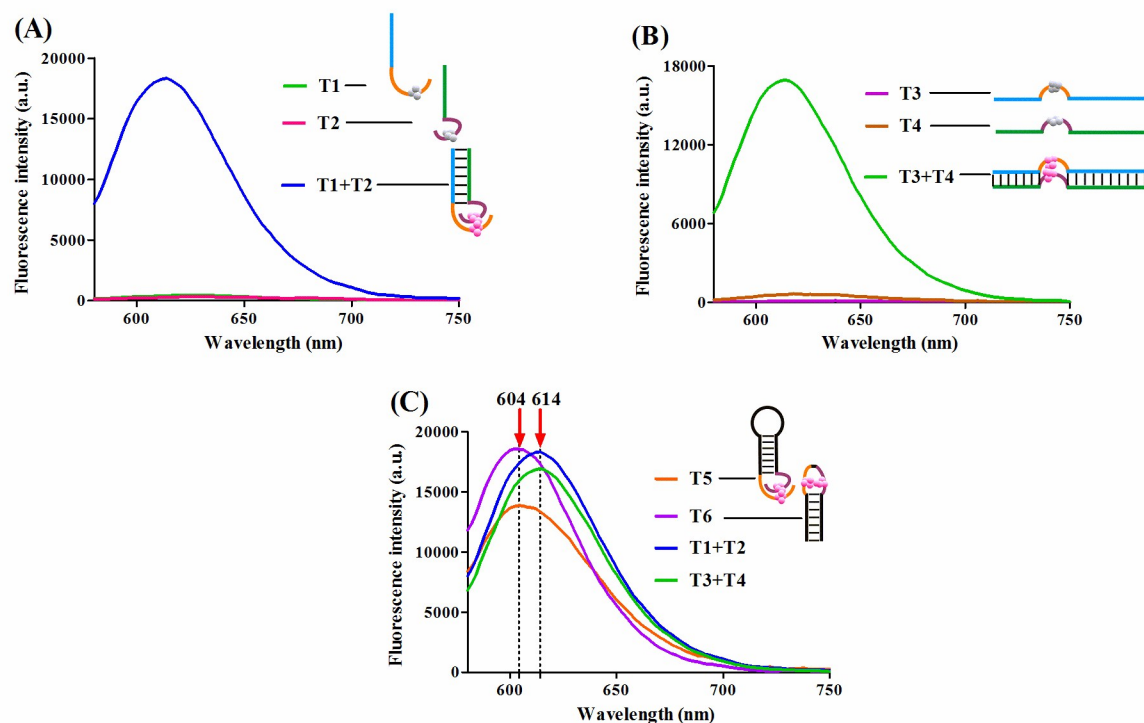

**Figure S1.** Fluorescence emission spectra of four modes of emitter pair in close proximity. (A) Emission spectra of DNA/AgNCs produced by T1, T2, and the mixture of T1 and T2, respectively. The produced emitter pairs are located at end of T1 and T2 with complementary tails of polythymine and polyadenine, which are difficult to binding Ag ions, exclude the possibility that complementary stem domain participates to form fluorescent emitter pair. (B) Emission spectra of DNA/AgNCs produced by T3, T4, and the mixture of T3 and T4, respectively. (C) Comparison of fluorescence emission of DNA/AgNCs stabilized by four modes of emitter pairs provided by T5, T6, mixture of T1 and T2, and mixture of T3 and T4. The final concentrations of all DNA templates used in the reaction system were 1  $\mu$ M.

## 2.2 S-T<sub>n</sub>/AgNC (n=5, 10, 15, 20, 25, 30, 35, 70), S-0/AgNC, Y-T<sub>15</sub>/AgNCs, and T<sub>15</sub>-N/AgNCs

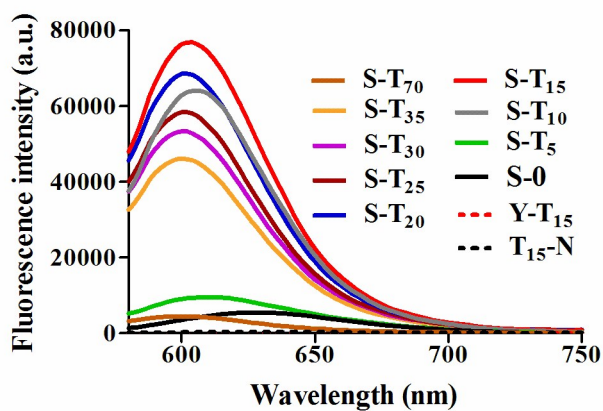

**Figure S2.** Fluorescence emission spectra of AgNCs stabilized by S-T<sub>n</sub> (n=5, 10, 15, 20, 25, 30, 35, 70) with n thymines, S-0 without spacer, Y-T<sub>15</sub> containing Y emitter and 15-nt polythymine spacer and T<sub>15</sub>-N containing N emitter and 15-nt polythymine spacer.

### 2.3 S-G<sub>n</sub>/AgNCs (n=1, 3, 5, 7, 10, 16 and 18)

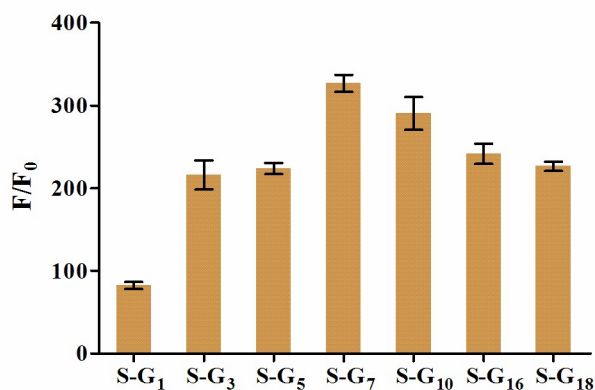

**Figure S3.** The fluorescence enhancement ratio  $F/F_0$  values for AgNCs stabilized by DNA template (S-G<sub>n</sub>, n=1, 3, 5, 7, 10, 16 and 18) with guanine-rich spacers. F is the fluorescence intensity of S-G<sub>n</sub>/AgNCs at 646 nm,  $F_0$  is the fluorescence intensity of Y-T<sub>15</sub>/AgNCs at 646 nm. The reason of selection of guanine-rich sequence not polyguanine is that longer polyguanine sequence cannot be obtained by the limited commercial DNA synthesis technology. The final concentrations of all DNA templates used in the reaction system were 1  $\mu$ M.



## 2.4 Changes in fluorescence intensity before and after adding inhibitor

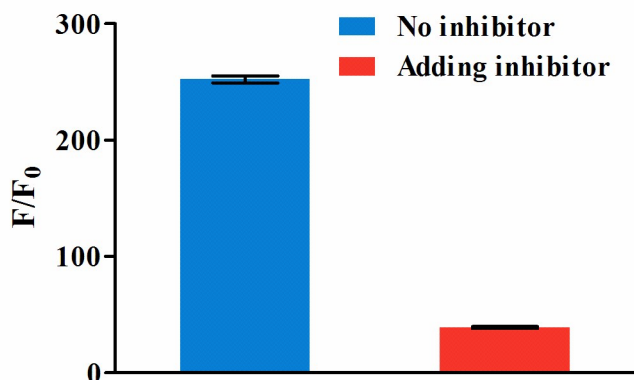

**Figure S4.** Comparison in the fluorescence intensity of S-AT/AgNCs before and after adding the complement of spacer in S-AT as inhibitor.  $F$  is the fluorescence intensities of AgNCs stabilized by S-AT at 608 nm,  $F_0$  is the fluorescence intensities of Y-T<sub>15</sub>/AgNCs at 608 nm.

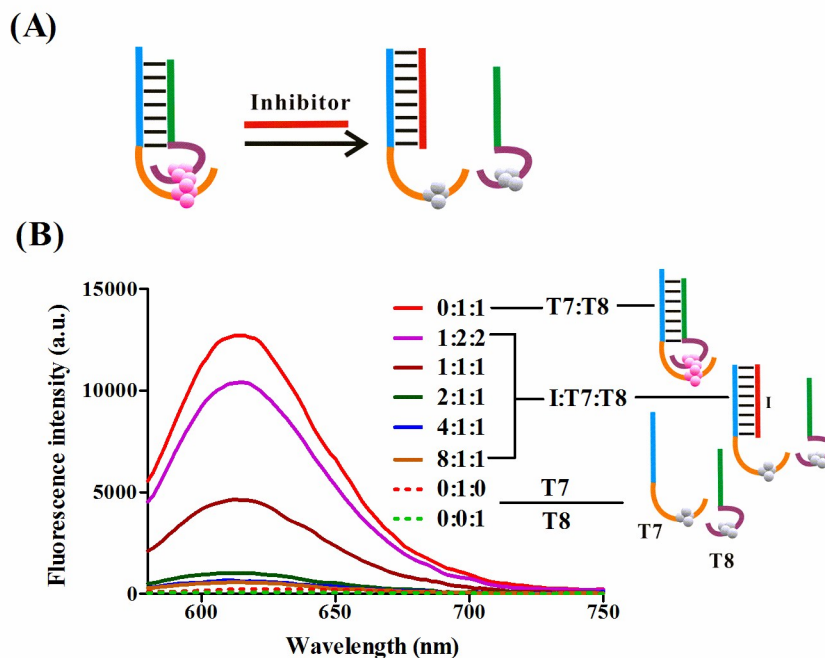

**Figure S5.** (A) Schematic illustration of the fluorescence quenching of Ag emitter pair from the duplex of T7 and T8 via the hybridization between T7 and inhibitor. (B) Emission spectra of DNA/AgNCs produced by the mixture of T7, T8, and inhibitor (I) according to different molar ratios (I/T7/T8 ratios).

In the competitive binding experiment, the molar ratio [0:1:1] indicates the mixture of 0  $\mu\text{M}$  I, 1  $\mu\text{M}$  T7 and 1  $\mu\text{M}$  T8, [0:1:0] and [0:0:1] indicate 1  $\mu\text{M}$  T7 and 1  $\mu\text{M}$  T8 present alone, respectively; [1:2:2], [1:1:1], [2:1:1], [4:1:1], and [8:1:1] indicate 0.5  $\mu\text{M}$ , 1  $\mu\text{M}$ , 2  $\mu\text{M}$ , 4  $\mu\text{M}$  and 8  $\mu\text{M}$  I plus 1  $\mu\text{M}$  T7 and 1  $\mu\text{M}$  T8, respectively.

## 2.5 The replacement of nucleobase in spacer of DNA template

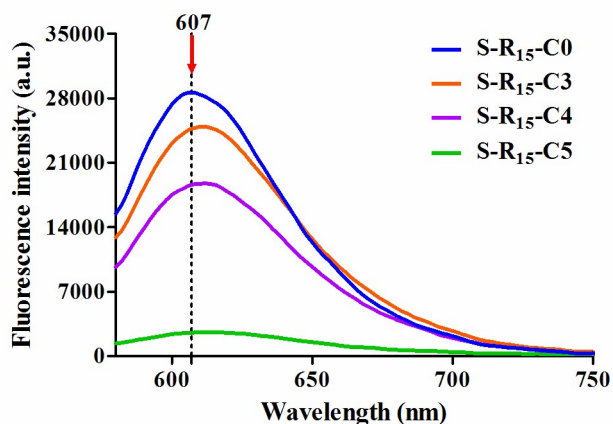

**Figure S6.** Comparison of fluorescence emission spectra of AgNCs stabilized by DNA templates containing increased number of cytosines in a spacer sequence initially containing only adenine and thymine. S-R<sub>15</sub>-C<sub>3</sub>, S-R<sub>15</sub>-C<sub>4</sub>, and S-R<sub>15</sub>-C<sub>5</sub> represent the DNA templates with substitution of 3 thymines, 4 thymines, and 5 thymines by cytosine in the original 15-nt adenine- and thymine-rich spacer sequence, respectively, and the DNA template (S-R<sub>15</sub>-C<sub>0</sub>) without cytosine in spacer sequence as a control. The final concentrations of tested DNA templates in the reaction system were 1  $\mu$ M.

## 2.6 S-PEG(5)-T4/AgNCs and S-PEG(5)/AgNCs

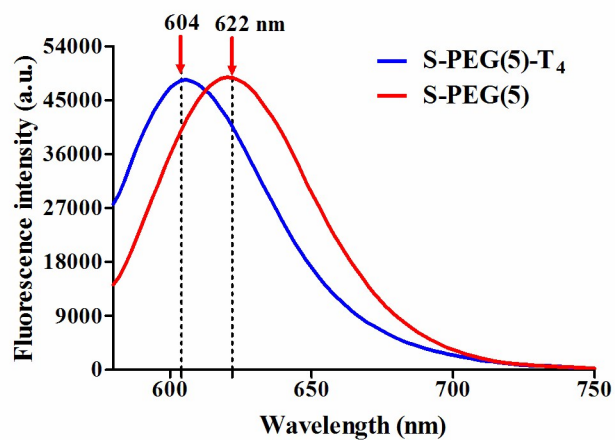

**Figure S7.** Fluorescence emission spectra of AgNCs stabilized by S-PEG(5)-T<sub>4</sub> containing uncharged poly-ethylene glycol (PEG) and 4-nt thymines and S-PEG(5) without 4-nt thymines, respectively. The final concentrations of all the templates in the reaction system were 1  $\mu$ M.

## 2.7 The emission spectra of DNA/AgNCs at different excitation

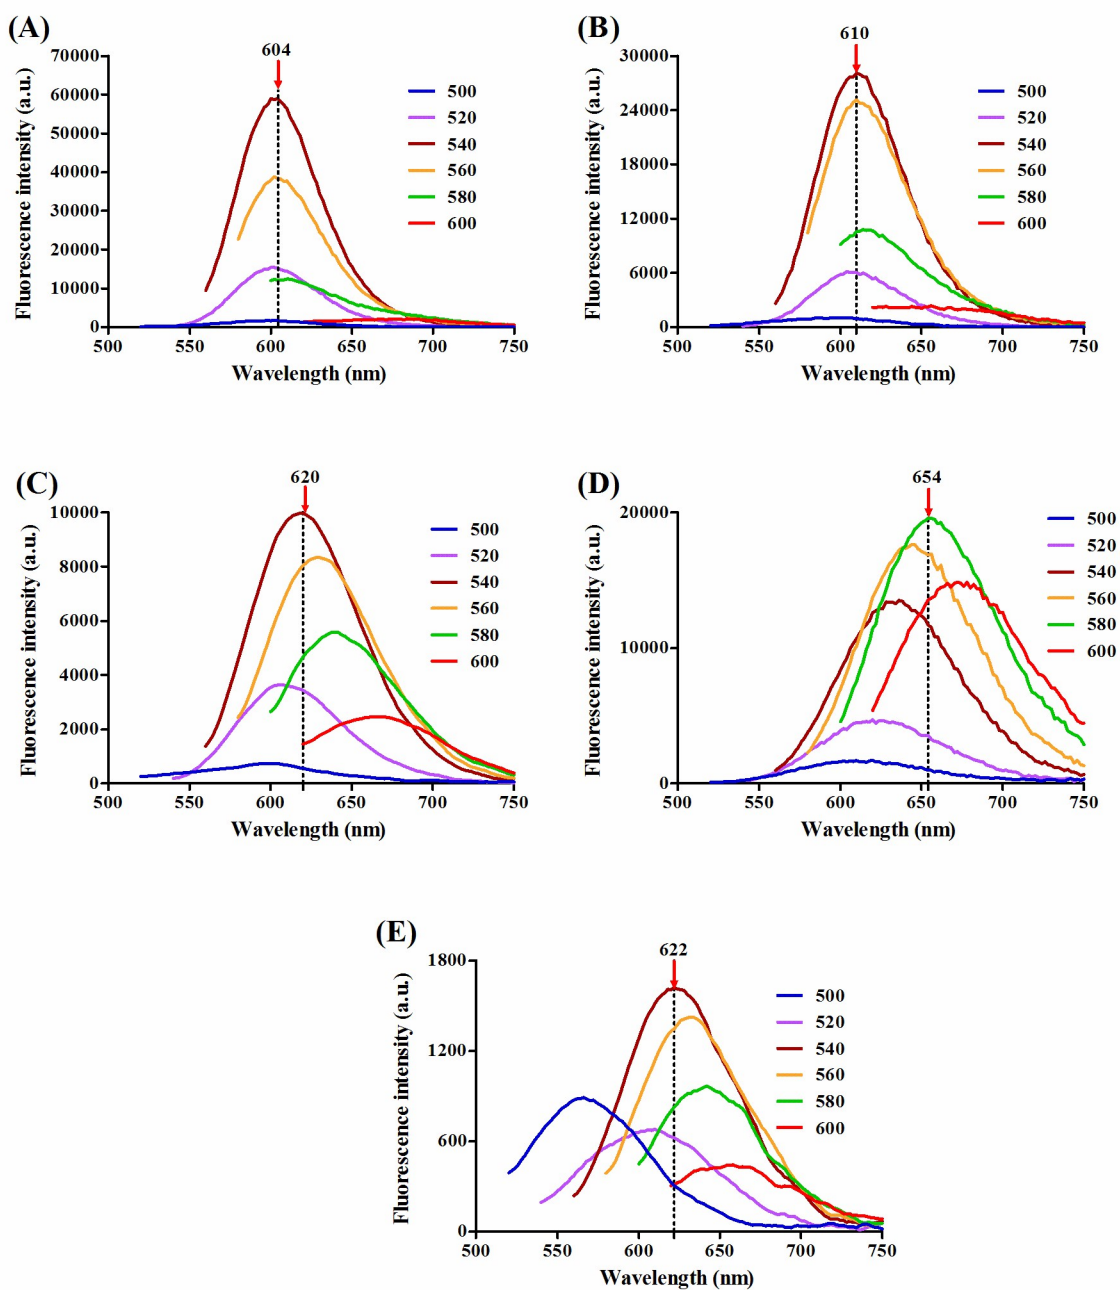

**Figure S8.** Fluorescence emission spectra of AgNCs stabilized by (A) S-T<sub>15</sub>, (B) S-A<sub>15</sub>, (C) S-C<sub>15</sub>, (D) S-G<sub>16</sub>, and (E) S-0, respectively, with excitation from 500-600 nm in 20 nm steps.

## 2.8 The mixture of two templates containing one emitter and 15-nt polythymine

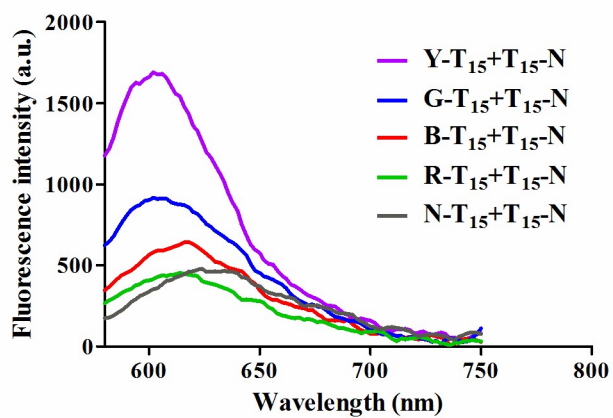

**Figure S9.** Fluorescence emission spectra of AgNCs stabilized by mixture of the two DNA templates containing one emitter-nucleation sequence and 15-nt polythymine spacer. The final concentrations of all DNA templates in the reaction system were 1  $\mu$ M.

## 2.9 Comparison of DNA/AgNCs from our design and the reported templates.

**Table S2.** Comparison of DNA/AgNCs from our design and the reported templates.

| <b>DNA template</b>      | <b>Concentration (<math>\mu\text{M}</math>)</b> | <b>Reduction time (min)</b> | <b>Excitation/Emission (nm)</b> | <b>Fluorescence intensity (a.u.)</b> |
|--------------------------|-------------------------------------------------|-----------------------------|---------------------------------|--------------------------------------|
| S-T <sub>15</sub>        | 1                                               | 15                          | 550/604                         | 60239 $\pm$ 288                      |
| S-1 and S-G <sup>1</sup> | 1                                               | 60                          | 568/630                         | 35934 $\pm$ 942                      |
| Y <sup>2</sup>           | 1                                               | 60                          | 472/562                         | 544 $\pm$ 3                          |
| N <sup>2</sup>           | 1                                               | 60                          | 560/616                         | 1460 $\pm$ 49                        |

## 2.10 The investigation on energy transfer

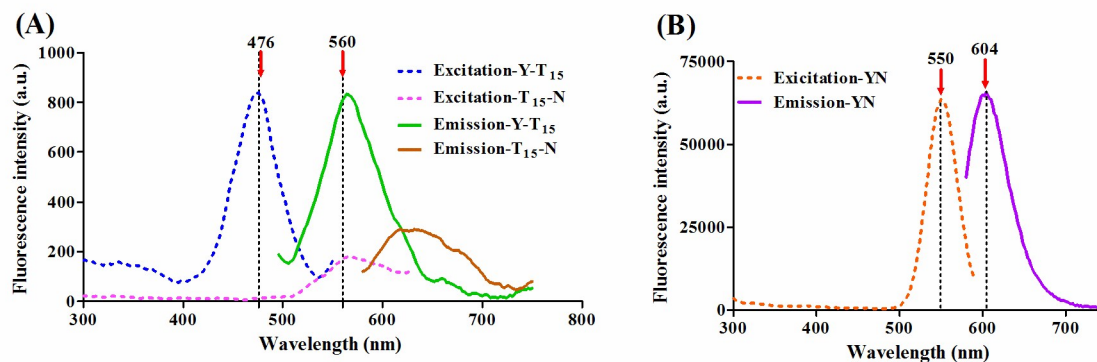

**Figure S10.** (A) Excitation (dashed curves) and emission spectra (solid curves) for Y-T<sub>15</sub> and T<sub>15</sub>-N. Y-T<sub>15</sub> contains with a yellow emitter and 15-nt polythymine spacer, and T<sub>15</sub>-N contains a near-IR emitter and 15-nt polythymine spacer. The final concentrations of Y-T<sub>15</sub> and T<sub>15</sub>-N templates were 1  $\mu$ M in the reaction system. (B) Excitation (dashed curves) and emission spectra (solid curves) for YN template (equal to S-T<sub>15</sub>). The final concentrations of the templates in the reaction system were 1  $\mu$ M.



## 2.11 The effect of AgNO<sub>3</sub> with different concentration

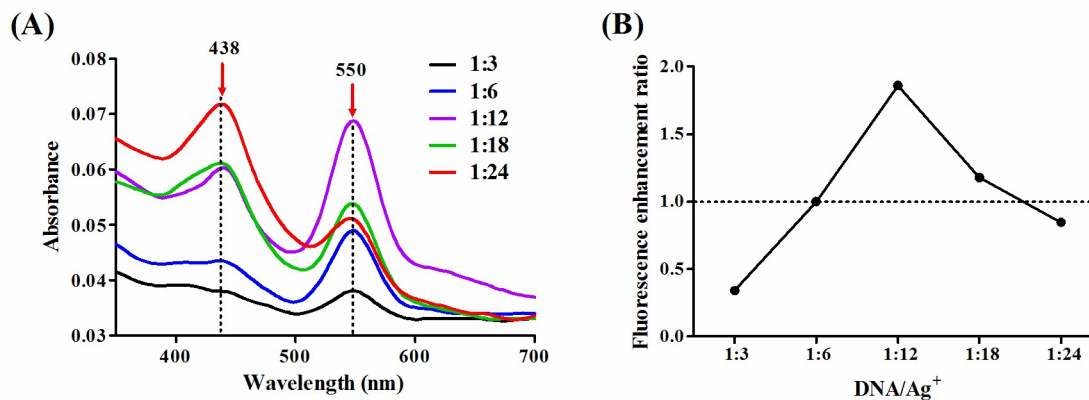

**Figure S11.** (A) Absorption spectra of AgNCs stabilized by S-T<sub>15</sub> after adding AgNO<sub>3</sub> with different concentration. (B) The fluorescence enhancement ratio change with increase of AgNO<sub>3</sub>. The fluorescence enhancement ratio is the fluorescence intensity of DNA/AgNCs at 604 nm under different ratio of DNA/Ag<sup>+</sup> versus the fluorescence intensity of DNA/AgNCs with 1:6 of DNA/Ag<sup>+</sup> at 604 nm used in the conventional method.

## 2.12 The effect of different pH

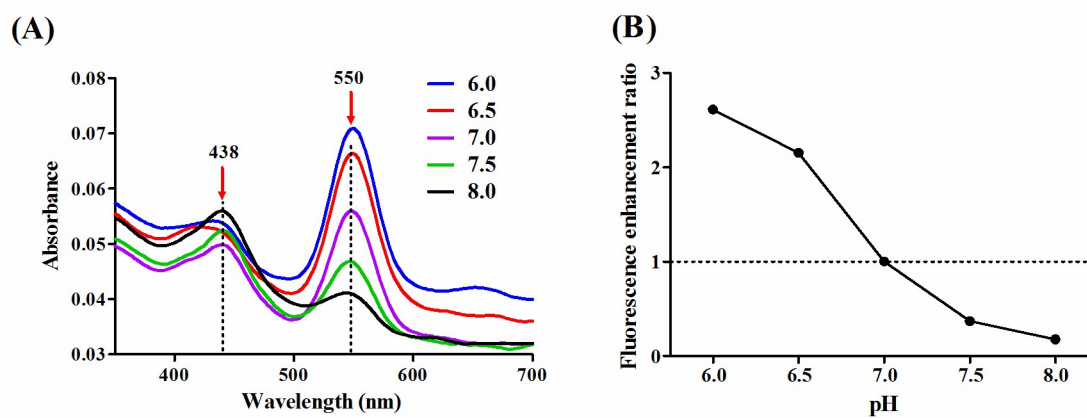

**Figure S12.** (A) Absorption spectra of AgNCs stabilized by S-T<sub>15</sub> at different pH. (B) The fluorescence enhancement ratio change with pH from 6.0 to 8.0. The fluorescence enhancement ratio is the fluorescence intensity of DNA/AgNCs at different pH versus the fluorescence intensity of DNA/AgNCs under pH 7.0 at 604 nm used in the conventional method.

### 3. References

- 1 H. C. Yeh, J. Sharma, J. J. Han, J. S. Martinez and J. H. Werner, *Nano Lett.*, 2010, **10**, 3106-3110.
- 2 C. I. Richards, S. Choi, J. C. Hsiang, Y. Antoku, T. Vosch, A. Bongiorno, Y. L. Tzeng and R. M. Dickson, *J. Am. Chem. Soc.*, 2008, **130**, 5038-5039.
